# Supplementary material
Source: Springer Nature journal article supplement (https://www.springermedizin.de/resource/supplementary/12882_2011_313_MOESM2_ESM.pdf/9453618)

**Figure 1 a**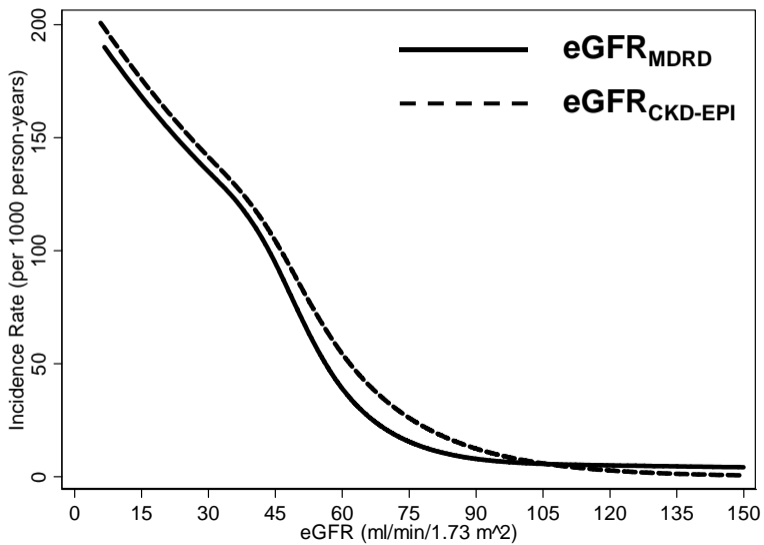**Figure 1 b**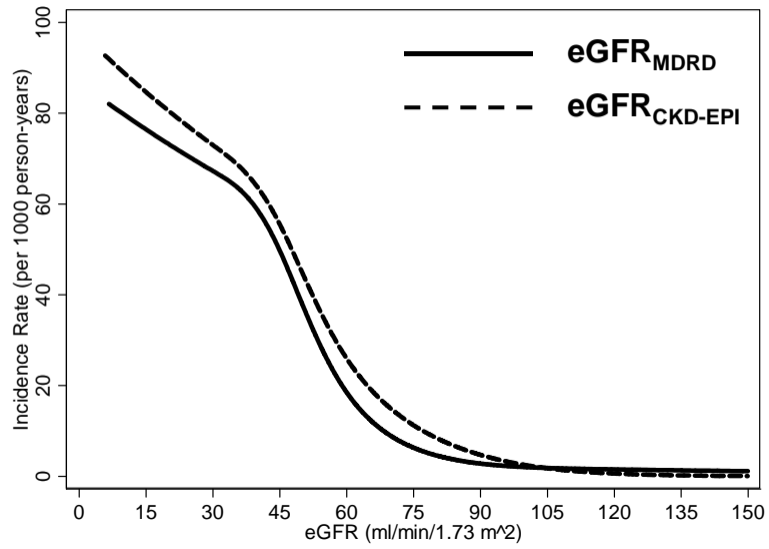

Supplement: MOESM2 [file 9453618]
